# Supplementary material
Source: publisher site journal article supplement (https://www.spandidos-publications.com/2576/downloadSupplementary)
Supplement: Supplementary file 1 [file downloadSupplementary]

**Appendix S1. Supporting information for the detailed synthesis process of PTL derivatives and their characterization data.**

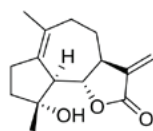

Synthesis of micheliolide (MCL). To a solution of p-toluenesulfonic acid (86 mg, 0.5 mmol) in 100 ml CH<sub>2</sub>Cl<sub>2</sub> was added dropwise a solution of parthenolide (3.5 g, 14 mol) in 20 ml CH<sub>2</sub>Cl<sub>2</sub> at room temperature for 20 min. The resulting reaction mixture was stirred at room temperature overnight. The reaction was quenched with 20 ml saturated NaHCO<sub>3</sub>. The organic layer was washed with saturated brine (2x20 ml), dried over anhydrous Na<sub>2</sub>SO<sub>4</sub>, and concentrated under reduced pressure to give a crude residue, which was recrystallized from acetone to yield a pale yellow crystalline solid (3.2 g, 91%). <sup>1</sup>H NMR (400 MHz, CDCl<sub>3</sub>) δ 6.22 (d, *J* = 3.3 Hz, 1H), 5.51 (d, *J* = 3.0 Hz, 1H), 3.82 (t, *J* = 10.3 Hz, 1H), 2.80-2.59 (m, 3H), 2.40 (dd, *J* = 16.3, 8.4 Hz, 1H), 2.30-2.14 (m, 3H), 2.14-2.04 (m, 1H), 1.84-1.74 (m, 2H), 1.69 (s, 3H), 1.40-1.28 (m, 4H). <sup>13</sup>C NMR (101 MHz, CDCl<sub>3</sub>) δ 169.71, 138.88, 131.87, 130.88, 119.39, 84.45, 80.25, 58.69, 49.62, 38.38, 34.97, 30.08, 25.81, 23.88, 22.73.

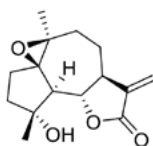

Synthesis of Compound 1. A solution of micheliolide (1.75 g, 7 mmol) and m-CPBA (1.8 g, 10.5 mmol) in 50 ml CH<sub>2</sub>Cl<sub>2</sub> was stirred at room temperature overnight. The reaction mixture was washed with Na<sub>2</sub>SO<sub>3</sub> (2x30 ml), NaHCO<sub>3</sub> (2x50 ml), and saturated brine (2x30 ml), dried over anhydrous Na<sub>2</sub>SO<sub>4</sub>, and concentrated under reduced pressure to give a crude residue, which was recrystallized from acetone to yield Compound 3 as crystalline solid (1.3 g, 70%). <sup>1</sup>H NMR (400 MHz, CDCl<sub>3</sub>) δ 6.20 (d, *J* = 3.3 Hz, 1H), 5.48 (d, *J* = 3.0 Hz, 1H), 4.05 (t, *J* = 10.4 Hz, 1H), 2.81 (s, 1H), 2.38-2.19 (m, 4H), 2.04-1.82 (m, 4H), 1.70-1.61 (m, 1H), 1.48 (s, 3H), 1.46-1.37 (m, 1H), 1.30 (s, 3H). <sup>13</sup>C NMR (101 MHz, CDCl<sub>3</sub>) δ 169.62, 138.16, 119.55, 81.83, 79.71, 69.89, 62.19, 55.62, 49.45, 37.37, 33.41, 29.53, 23.26, 21.97.

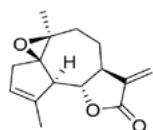

Synthesis of arglabin. To a stirred solution of Compound 1 (264 mg, 1.0 mmol) in 5 ml pyridine was added 300 μl POCl<sub>3</sub> at 0°C. The mixture was stirred for 2 h, 30 ml Et<sub>2</sub>O was added, and the organic layer was washed successively with NaHCO<sub>3</sub> and brine, dried over anhydrous Na<sub>2</sub>SO<sub>4</sub>, and concentrated under reduced pressure to give crude residue. Then the residue was chromatographed on a silica gel column to afford arglabin (112 mg, yield 45%). <sup>1</sup>H NMR (400 MHz, CDCl<sub>3</sub>) δ 6.15 (d, *J* = 3.3 Hz, 1H), 5.58 (s, 1H), 5.42 (d, *J* = 3.1 Hz, 1H), 4.01 (t, *J* = 10.2 Hz, 1H), 2.94 (d, *J* = 10.7 Hz, 1H), 2.83-2.74 (m, 1H), 2.29-2.11 (m, 3H), 2.07-2.01 (m, 1H), 1.99 (d, *J* = 7.9 Hz, 3H), 1.88-1.82 (m, 1H), 1.55-1.45 (m, 1H), 1.35 (d, *J* = 6.4 Hz, 3H). <sup>13</sup>C NMR (101 MHz, CDCl<sub>3</sub>) δ 170.43, 140.57, 139.14, 124.91,

118.27, 82.89, 72.52, 62.68, 52.85, 51.05, 39.71, 33.48, 22.79, 21.45, 18.25.

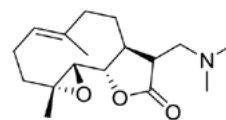

Synthesis of DMAPT. Twenty milligrams of PTL was dissolved in 2 ml THF, K<sub>2</sub>CO<sub>3</sub> (10 mg) and dimethylamine (40 wt.% solution in water, 0.5 ml) were added separately. The reaction mixture was stirred at room temperature overnight, 20 ml CH<sub>2</sub>Cl<sub>2</sub> was added, washed with saturated brine (2x20 ml). The organic layer was dried over anhydrous Na<sub>2</sub>SO<sub>4</sub>, and concentrated under reduced pressure to give DMAPT as yellow solid (22 mg, 93%). <sup>1</sup>H NMR (400 MHz, CDCl<sub>3</sub>) δ 5.25-5.16 (m, 1H), 3.86 (t, *J* = 9.1 Hz, 1H), 2.89-2.82 (m, 1H), 2.78-2.70 (m, 2H), 2.57 (d, *J* = 11.2 Hz, 1H), 2.39 (s, 6H), 2.33-2.02 (m, 7H), 1.74-1.62 (m, 4H), 1.30 (s, 3H), 1.26-1.20 (m, 1H). <sup>13</sup>C NMR (101 MHz, CDCl<sub>3</sub>) δ 176.21, 134.68, 125.12, 82.29, 66.38, 61.56, 57.31, 48.21, 46.15, 45.77, 41.09, 36.68, 29.81, 24.12, 17.23, 16.93. HRMS (ESI) *m/z* calcd for C<sub>17</sub>H<sub>28</sub>NO<sub>3</sub><sup>+</sup> (*M*+*H*)<sup>+</sup> 294.20637, found 294.20624.

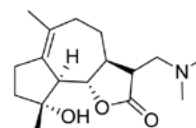

Synthesis of Compound 2. Twenty milligrams of MCL was dissolved in 2 ml THF, K<sub>2</sub>CO<sub>3</sub> (10 mg) and dimethylamine (40 wt.% solution in water, 0.5 ml) were added separately. The reaction mixture was stirred at room temperature overnight; 20 ml CH<sub>2</sub>Cl<sub>2</sub> was added, washed with saturated brine (2x20 ml). The organic layer was dried over anhydrous Na<sub>2</sub>SO<sub>4</sub>, and concentrated under reduced pressure to give Compound 2 as yellow solid (23 mg, 97%). <sup>1</sup>H NMR (400 MHz, CDCl<sub>3</sub>) δ 3.76 (t, *J* = 10.3 Hz, 1H), 2.67 (dd, *J* = 12.9, 5.0 Hz, 1H), 2.60-2.49 (m, 2H), 2.38-2.28 (m, 2H), 2.20 (s, 6H), 2.14-2.03 (m, 4H), 1.96 (d, *J* = 11.4 Hz, 1H), 1.72 (dd, *J* = 15.1, 8.3 Hz, 2H), 1.60 (s, 3H), 1.21 (d, *J* = 17.0 Hz, 4H). <sup>13</sup>C NMR (101 MHz, CDCl<sub>3</sub>) δ 176.00, 130.84, 130.34, 83.13, 79.34, 57.34, 57.11, 49.97, 44.93, 43.68, 37.43, 34.37, 29.00, 26.32, 22.75, 21.81. HRMS (ESI) *m/z* calcd for C<sub>17</sub>H<sub>28</sub>NO<sub>3</sub><sup>+</sup> (*M*+*H*)<sup>+</sup> 294.20637, found 294.20630.

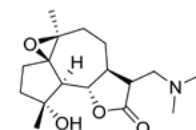

Synthesis of Compound 3. Twenty milligrams of Compound 1 was dissolved in 2 ml THF, K<sub>2</sub>CO<sub>3</sub> (10 mg) and dimethylamine (40 wt.% solution in water, 0.5 ml) were added separately. The reaction mixture was stirred at room temperature overnight, 20 ml CH<sub>2</sub>Cl<sub>2</sub> was added, washed with saturated brine (2x20 ml). The organic layer was dried over anhydrous Na<sub>2</sub>SO<sub>4</sub>, and concentrated under reduced pressure to give Compound 3 as yellow solid (22 mg, 96%). <sup>1</sup>H NMR (400 MHz, CDCl<sub>3</sub>) δ 4.00 (t, *J* = 10.4 Hz, 1H), 2.63 (dd, *J* = 13.0, 5.0 Hz, 1H), 2.51-2.44 (m, 1H), 2.31-2.24 (m, 1H), 2.17 (s, 6H), 2.09-2.03 (m, 1H), 1.88-1.81 (m, 3H), 1.80-1.70 (m, 2H), 1.66-1.53 (m, 3H), 1.39 (s, 3H), 1.34-1.27 (m, 1H), 1.21 (s, 3H). <sup>13</sup>C NMR (101 MHz, CDCl<sub>3</sub>) δ 175.94, 80.60, 78.67, 68.84, 61.23, 56.89, 54.27, 49.39, 44.93, 43.22, 36.42, 32.57,

28.37, 22.20. HRMS (ESI)  $m/z$  calcd for  $C_{17}H_{28}NO_4^+$  ( $M+H$ )<sup>+</sup> 310.20128, found 310.20114.

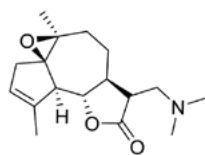

**Synthesis of Compound 4.** Twenty milligrams of arglabin was dissolved in 2 ml THF,  $K_2CO_3$  (10 mg) and dimethylamine (40 wt.% solution in water, 0.5 ml) were added separately. The reaction mixture was stirred at room temperature overnight; 20 ml  $CH_2Cl_2$  was added, washed with saturated brine (2x20 ml). The organic layer was dried over anhydrous  $Na_2SO_4$ , and concentrated under reduced pressure to give Compound 4 as a yellow solid (23 mg, 92%).  $^1H$  NMR (400 MHz,  $CDCl_3$ )  $\delta$  5.49 (s, 1H), 3.94 (t,  $J$  = 10.2 Hz, 1H), 2.68 (ddd,  $J$  = 21.9, 17.7, 7.6 Hz, 3H), 2.49 (dd,  $J$  = 13.0, 6.1 Hz, 1H), 2.23 (dd,  $J$  = 11.8, 5.5 Hz, 1H), 2.17 (s, 6H), 2.10-2.00 (m, 2H), 1.86 (s, 4H), 1.56 (dd,  $J$  = 22.8, 10.8 Hz, 2H), 1.39 (d,  $J$  = 12.5 Hz, 1H), 1.26 (s, 3H).  $^{13}C$  NMR (101 MHz,  $CDCl_3$ )  $\delta$  176.72, 139.74, 123.71, 81.53, 71.49, 61.65, 56.99, 51.43, 50.87, 45.04, 43.55, 38.56, 32.66, 21.83, 21.70, 17.27. HRMS (ESI)  $m/z$  calcd for  $C_{17}H_{26}NO_3^+$  ( $M+H$ )<sup>+</sup> 292.19072, found 292.19067.

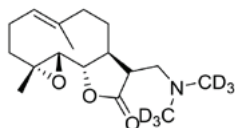

**Synthesis of DMAPT-D6.** Twenty milligrams of PTL was dissolved in 2 ml THF,  $K_2CO_3$  (50 mg) and dimethyl-*d*6-amine hydrochloride (20 mg) were added separately. The reaction mixture was stirred at room temperature overnight; 20 ml  $CH_2Cl_2$  was added, washed with saturated brine (2x20 ml). The organic layer was dried over anhydrous  $Na_2SO_4$ , and concentrated under reduced pressure to give DMAPT-D6 as a yellow solid (20 mg, 83%).  $^1H$  NMR (400 MHz,  $CDCl_3$ )  $\delta$  5.14 (d,  $J$  = 9.9 Hz, 1H), 3.76 (t,  $J$  = 9.0 Hz, 1H), 2.68 (dt,  $J$  = 6.7, 3.9 Hz, 2H), 2.56 (dd,  $J$  = 13.2, 4.7 Hz, 1H), 2.35-2.27 (m, 2H), 2.25-2.16 (m, 2H), 2.12-1.96 (m, 4H), 1.62 (d,  $J$  = 6.1 Hz, 3H), 1.60-1.50 (m, 1H), 1.23 (s, 3H), 1.17 (dd,  $J$  = 13.1, 5.6 Hz, 1H).  $^{13}C$  NMR (101 MHz,  $CDCl_3$ )  $\delta$  175.44, 133.64, 124.10, 81.10, 65.50, 60.43, 56.57, 46.92, 45.57, 40.12, 35.67, 28.98, 23.11, 16.23, 15.92. HRMS (ESI)  $m/z$  calcd for  $C_{17}H_{22}D_6NO_3^+$  ( $M+H$ )<sup>+</sup> 300.24403, found 300.24438.

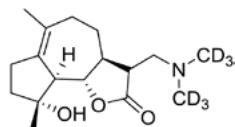

**Synthesis of Compound 5.** Twenty milligrams of MCL was dissolved in 2 ml THF,  $K_2CO_3$  (50 mg) and dimethyl-*d*6-amine hydrochloride (20 mg) were added separately. The reaction mixture was stirred at room temperature overnight, 20 ml

$CH_2Cl_2$  was added, washed with saturated brine (2x20 ml). The organic layer was dried over anhydrous  $Na_2SO_4$ , and concentrated under reduced pressure to give D Compound 5 as a yellow solid (23 mg, 95%).  $^1H$  NMR (400 MHz,  $CDCl_3$ )  $\delta$  3.75 (t,  $J$  = 10.3 Hz, 1H), 2.70-2.45 (m, 4H), 2.31 (dt,  $J$  = 11.6, 5.3 Hz, 2H), 2.21-2.04 (m, 4H), 1.97 (dd,  $J$  = 22.6, 11.1 Hz, 1H), 1.78-1.67 (m, 2H), 1.61 (s, 3H), 1.23 (s, 3H), 1.21-1.15 (m, 1H).  $^{13}C$  NMR (101 MHz,  $CDCl_3$ )  $\delta$  176.06, 130.86, 130.32, 83.11, 79.33, 57.36, 57.10, 49.94, 43.76, 37.41, 34.39, 29.00, 26.36, 22.75, 21.81. HRMS (ESI)  $m/z$  calcd for  $C_{17}H_{22}D_6NO_3^+$  ( $M+H$ )<sup>+</sup> 300.24403, found 300.24490.

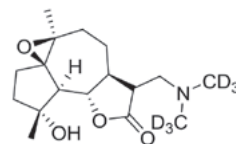

**Synthesis of Compound 6.** Twenty milligrams of Compound 1 was dissolved in 2 ml THF,  $K_2CO_3$  (50 mg) and dimethyl-*d*6-amine hydrochloride (20 mg) were added separately. The reaction mixture was stirred at room temperature overnight, 20 ml  $CH_2Cl_2$  was added, washed with saturated brine (2x20 ml). The organic layer was dried over anhydrous  $Na_2SO_4$ , and concentrated under reduced pressure to give Compound 6 as yellow solid (21 mg, 90%).  $^1H$  NMR (400 MHz,  $CDCl_3$ )  $\delta$  4.00 (t,  $J$  = 10.4 Hz, 1H), 2.61 (dd,  $J$  = 13.0, 5.0 Hz, 1H), 2.47 (dd,  $J$  = 13.0, 6.2 Hz, 1H), 2.28-2.12 (m, 3H), 2.09-2.02 (m, 1H), 1.84 (dd,  $J$  = 11.6, 6.2 Hz, 3H), 1.79-1.73 (m, 1H), 1.65-1.55 (m, 2H), 1.39 (s, 3H), 1.30 (d,  $J$  = 11.8 Hz, 1H), 1.21 (s, 3H).  $^{13}C$  NMR (101 MHz,  $CDCl_3$ )  $\delta$  176.00, 80.56, 78.66, 68.85, 61.23, 56.84, 54.27, 49.38, 43.27, 36.42, 32.58, 28.37, 22.20. HRMS (ESI)  $m/z$  calcd for  $C_{17}H_{22}D_6NO_4^+$  ( $M+H$ )<sup>+</sup> 316.23895, found 316.23895.

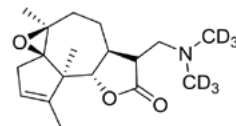

**Synthesis of Compound 7.** Twenty milligrams of arglabin was dissolved in 2 ml THF,  $K_2CO_3$  (50 mg) and dimethyl-*d*6-amine hydrochloride (20 mg) were added separately. The reaction mixture was stirred at room temperature overnight, 20 ml  $CH_2Cl_2$  was added, washed with saturated brine (2x20 ml). The organic layer was dried over anhydrous  $Na_2SO_4$ , and concentrated under reduced pressure to give Compound 7 as yellow solid (23 mg, 91%).  $^1H$  NMR (400 MHz,  $CDCl_3$ )  $\delta$  5.56 (s, 1H), 4.01 (t,  $J$  = 10.2 Hz, 1H), 2.86-2.67 (m, 3H), 2.57 (dd,  $J$  = 13.1, 6.0 Hz, 1H), 2.33-2.00 (m, 5H), 1.93 (s, 3H), 1.46 (dd,  $J$  = 18.6, 6.3 Hz, 2H), 1.33 (s, 3H).  $^{13}C$  NMR (101 MHz,  $CDCl_3$ )  $\delta$  177.74, 140.75, 124.75, 82.58, 72.51, 62.68, 57.78, 52.46, 51.84, 44.57, 39.58, 33.67, 29.71, 29.33, 27.23, 22.86, 22.73, 18.29, 14.11. HRMS (ESI)  $m/z$  calcd for  $C_{17}H_{20}D_6NO_3^+$  ( $M+H$ )<sup>+</sup> 298.22838, found 298.22818.

Figure S1.  $^1\text{H}$ -NMR spectrum for MCL. MCL, micheliolide.

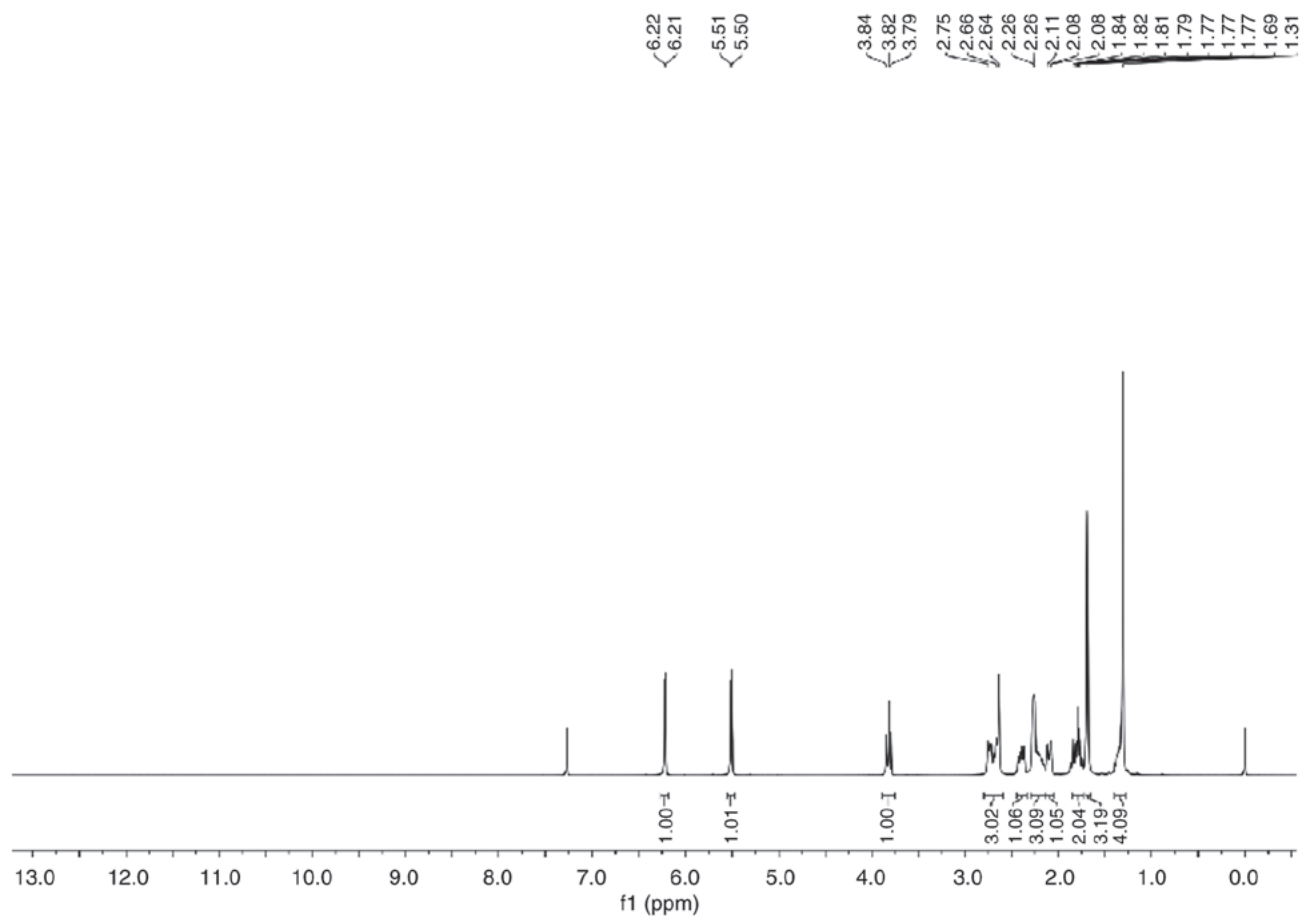

Figure S2.  $^{13}\text{C}$ -NMR spectrum for MCL. MCL, micheliolide.

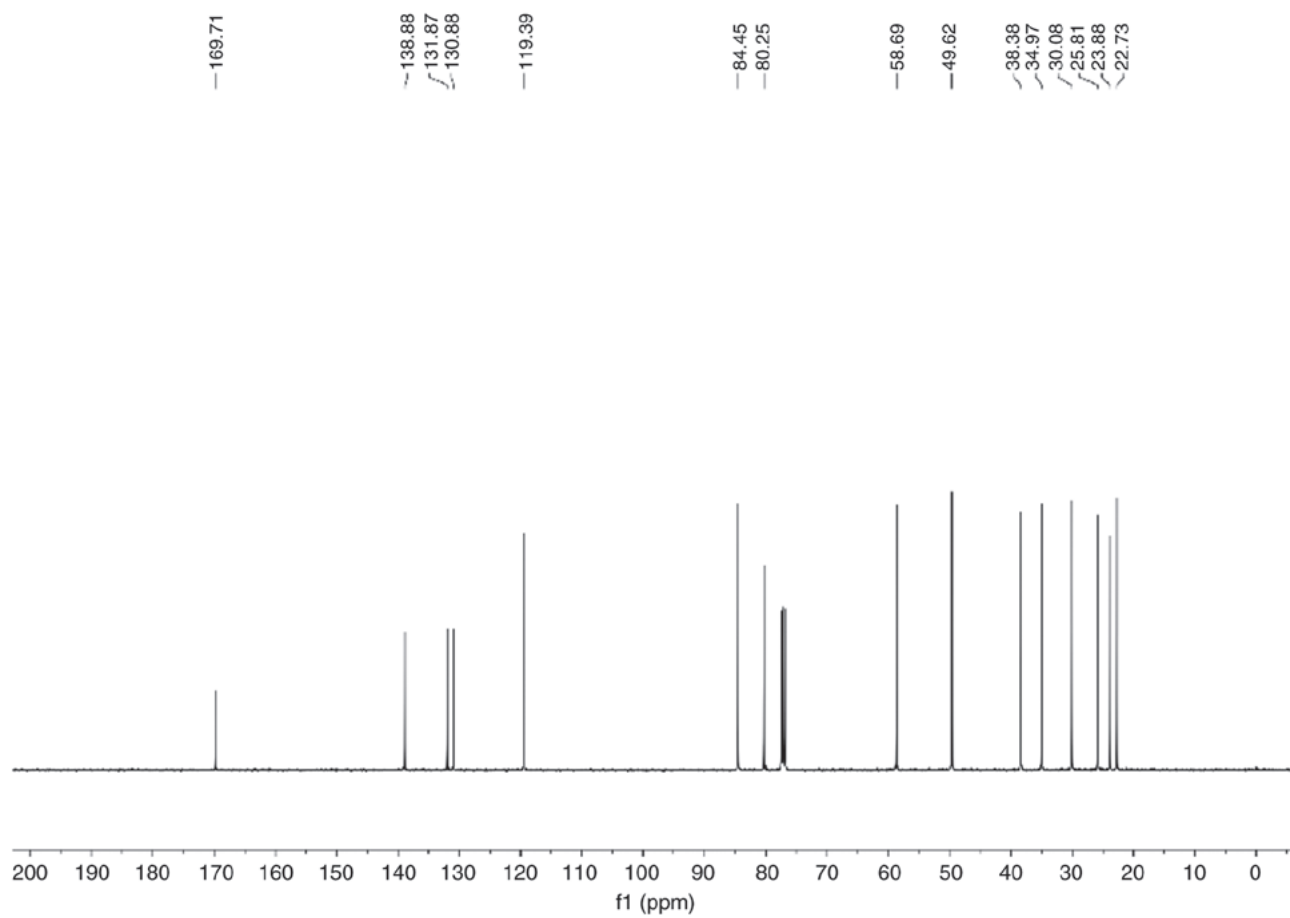

Figure S3.  $^1\text{H}$ -NMR spectrum for Compound 1.

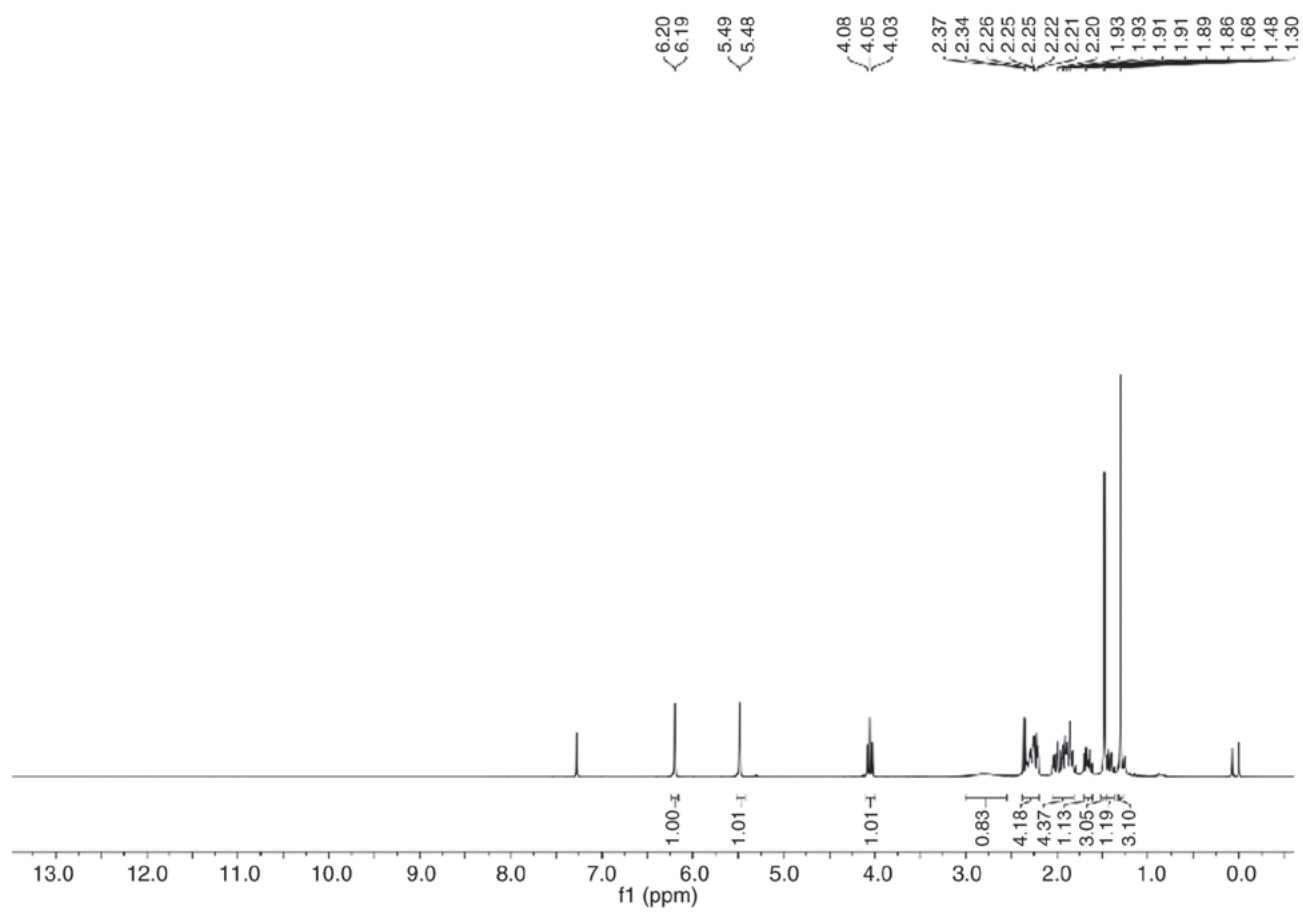

Figure S4.  $^{13}\text{C}$ -NMR spectrum for Compound 1.

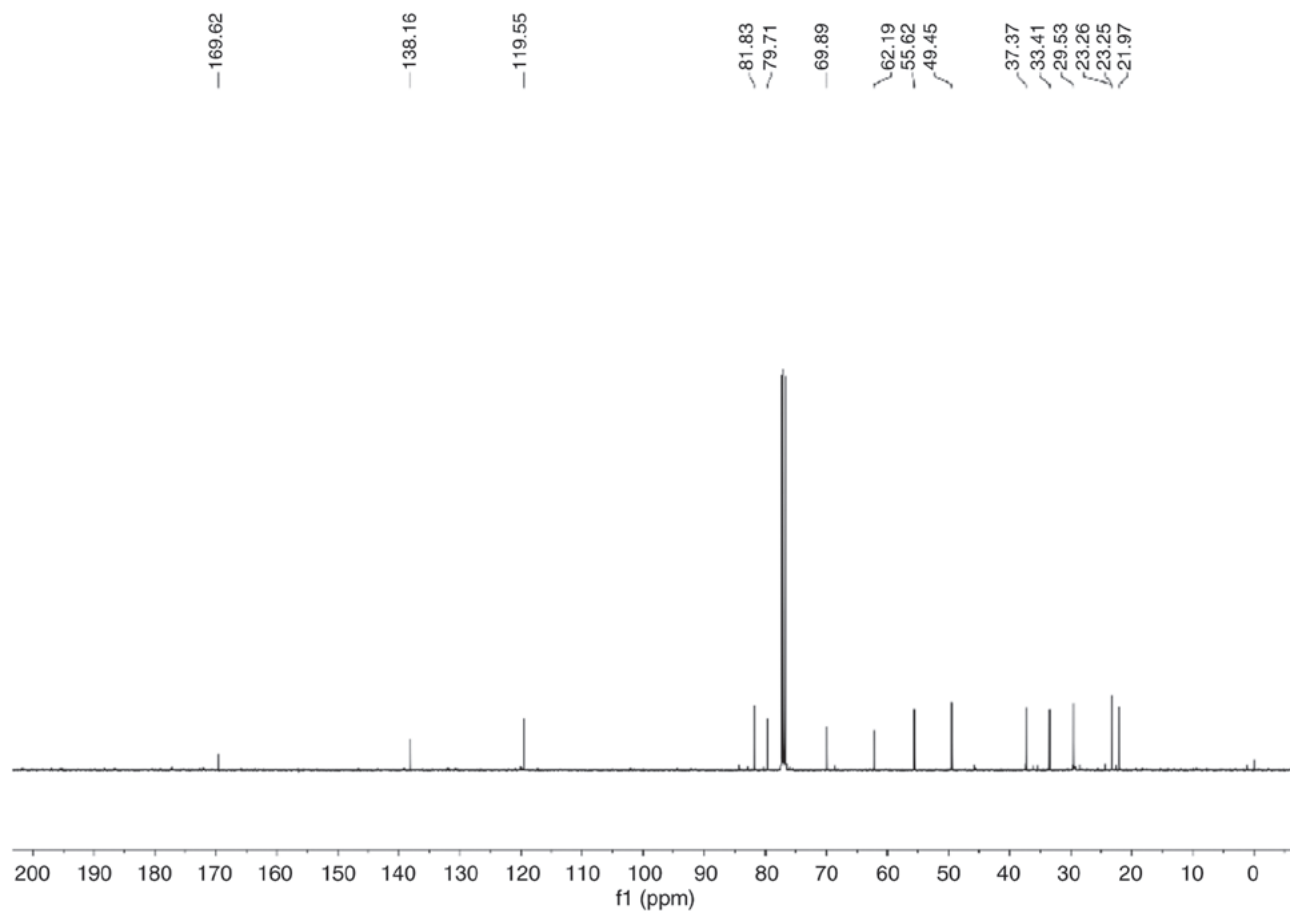

Figure S5.  $^1\text{H}$ -NMR spectrum for arglabin.

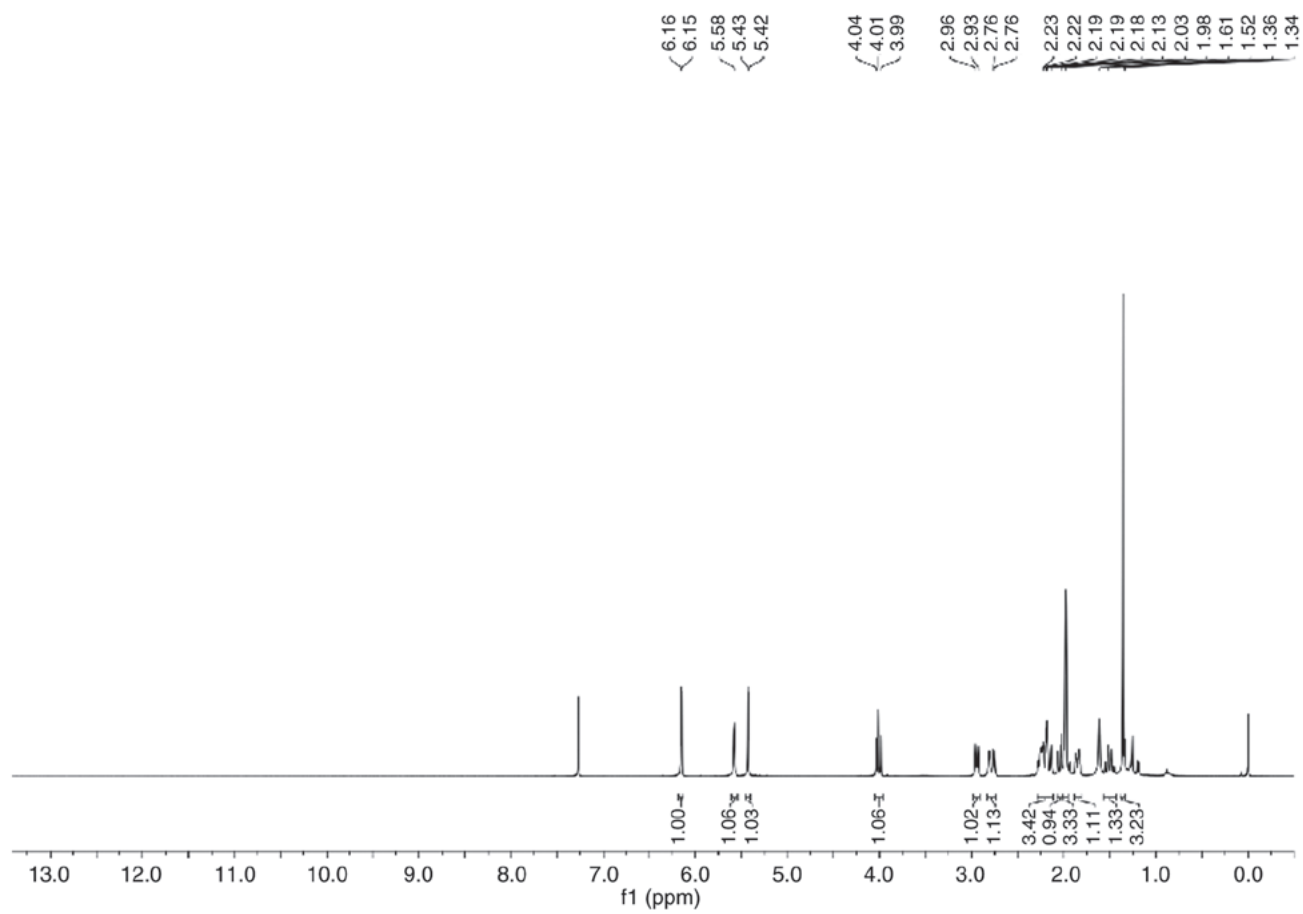

Figure S6.  $^{13}\text{C}$ -NMR spectrum for arglabin.

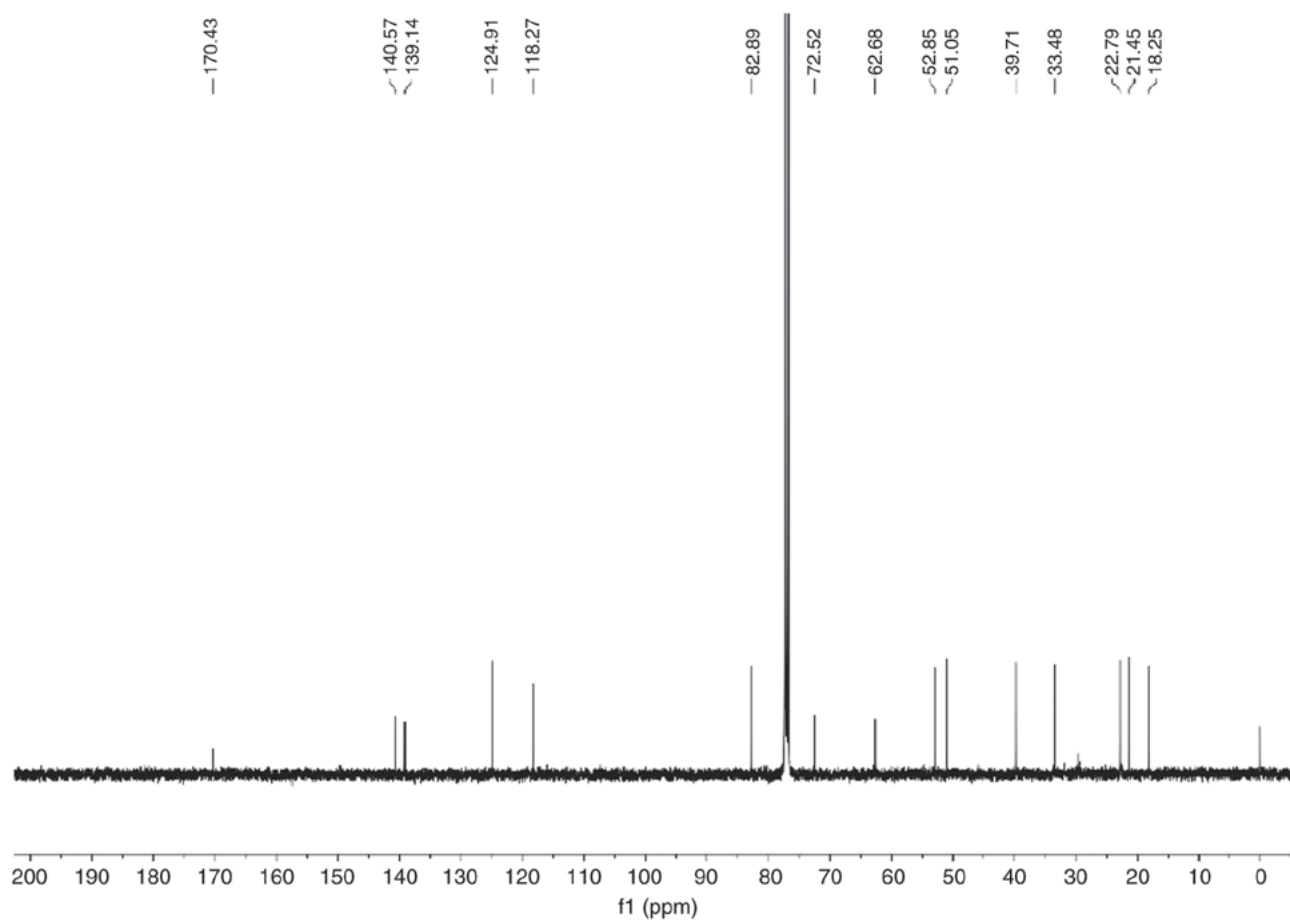



Figure S7.  $^1\text{H}$ -NMR spectrum for DMAPT. DMAPT, dimethylaminoparthenolide.

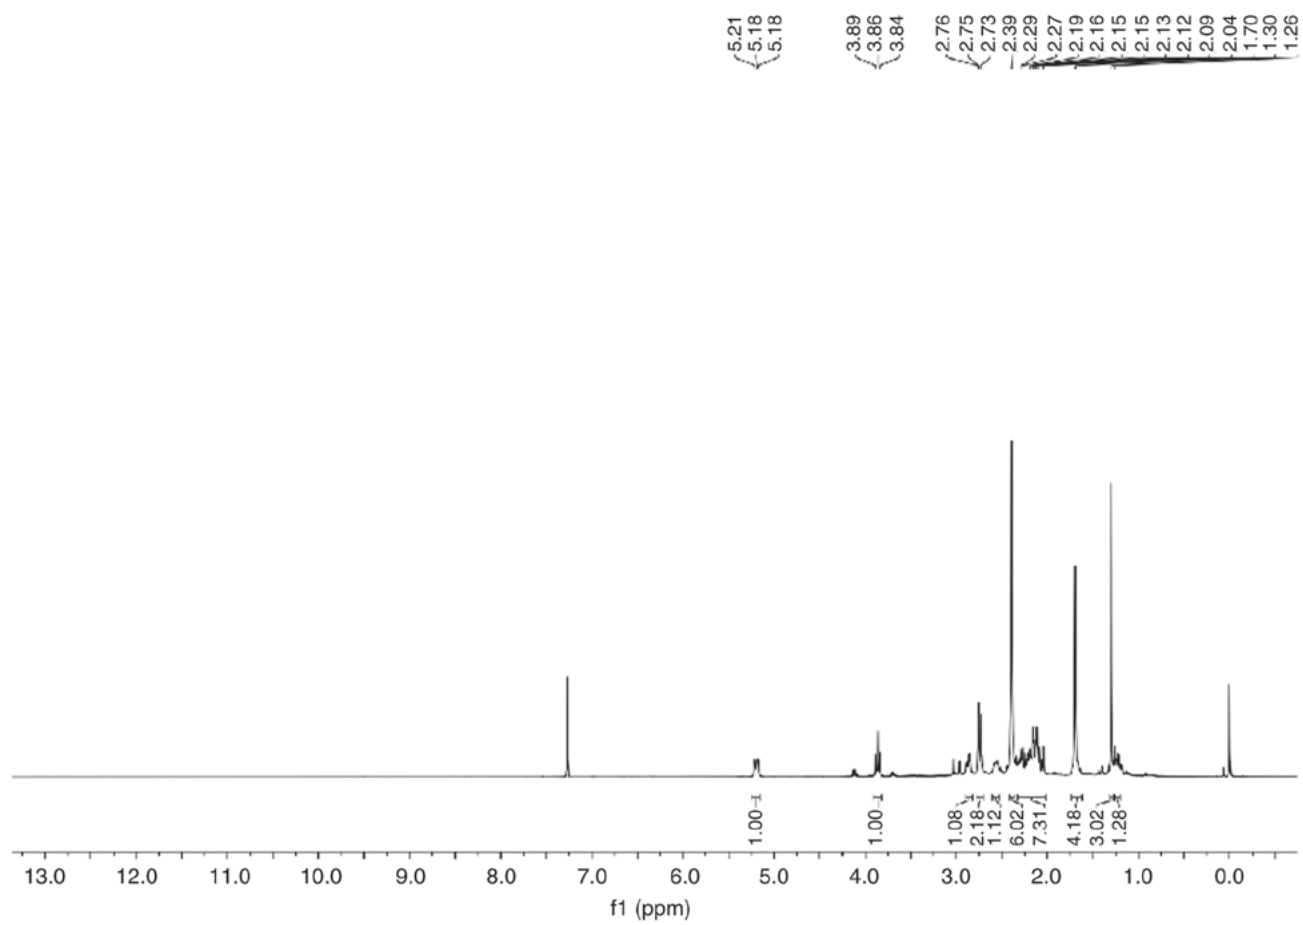

Figure S8.  $^{13}\text{C}$ -NMR spectrum for DMAPT. DMAPT, dimethylaminoparthenolide.

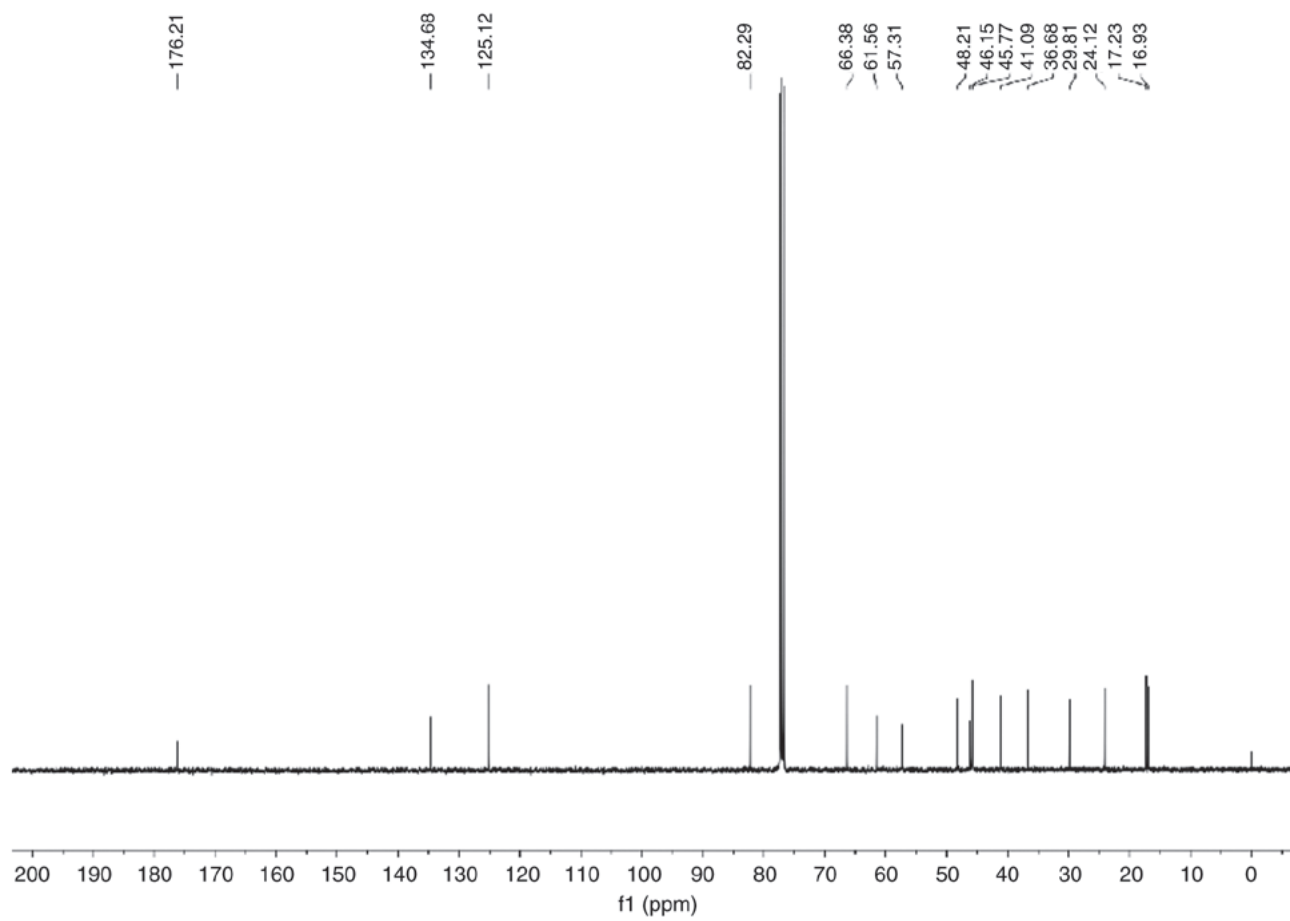

Figure S9.  $^1\text{H}$ -NMR spectrum for Compound 2.

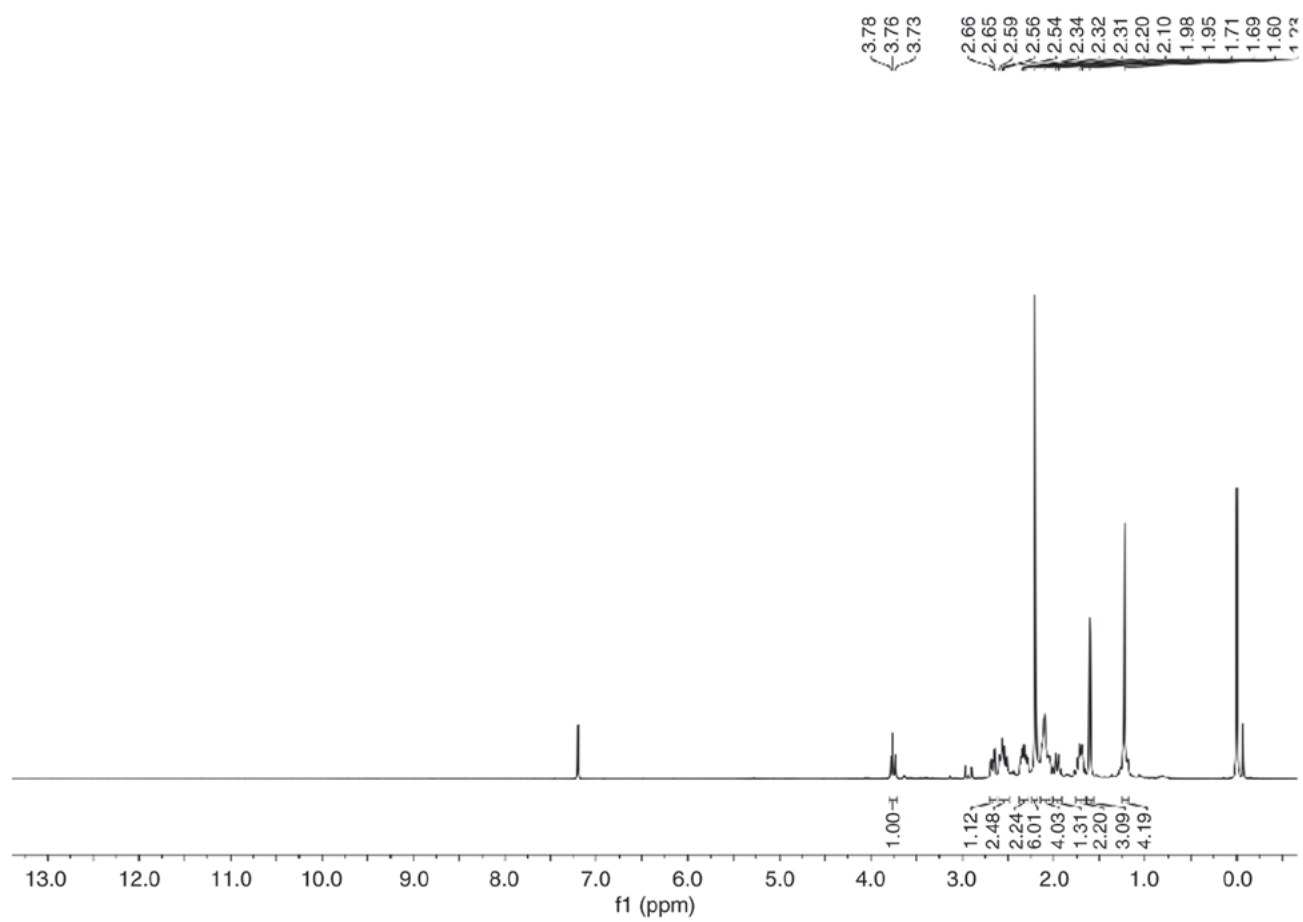

Figure S10.  $^{13}\text{C}$ -NMR spectrum for Compound 2.

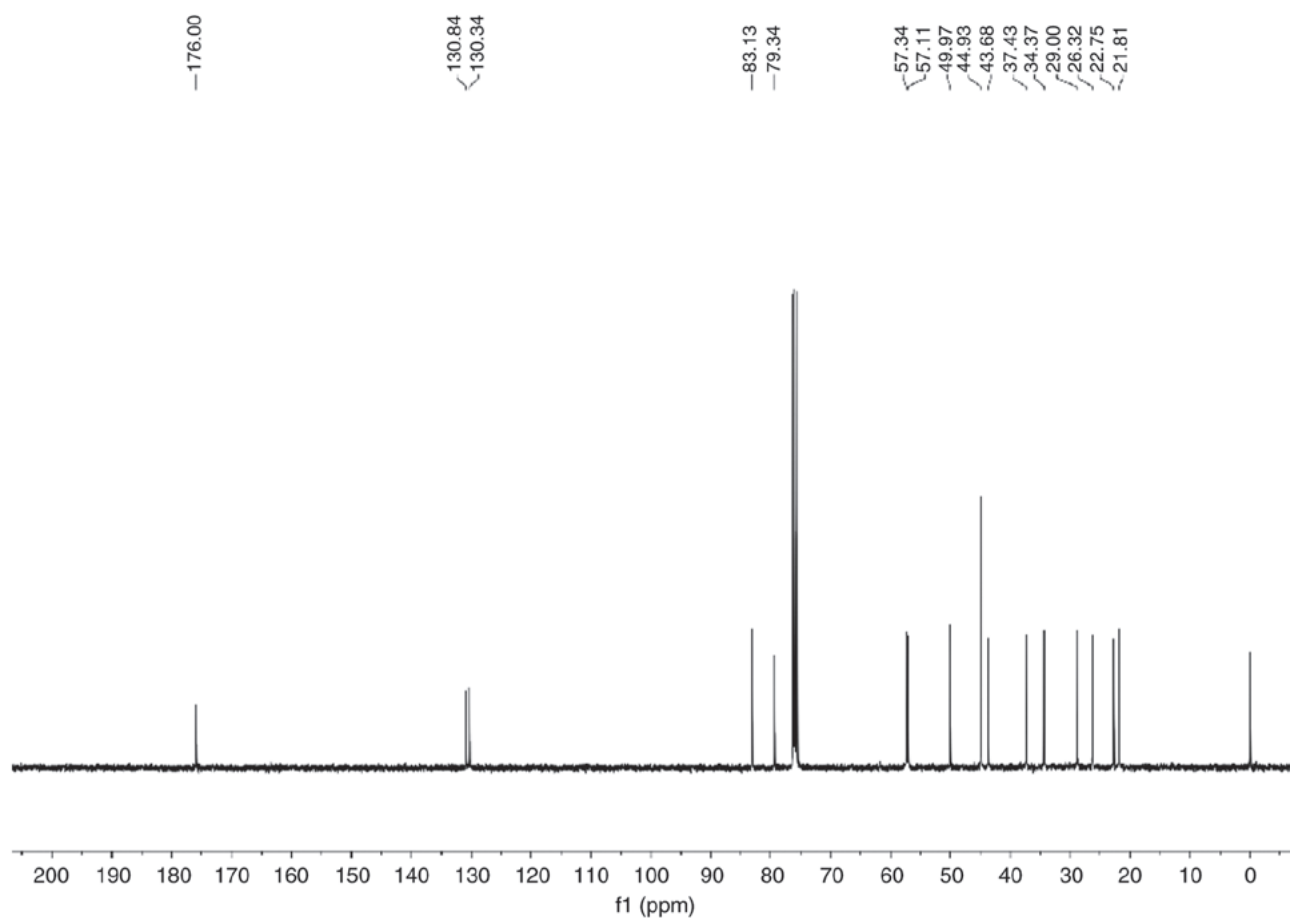

Figure S11.  $^1\text{H}$ -NMR spectrum for Compound 3.

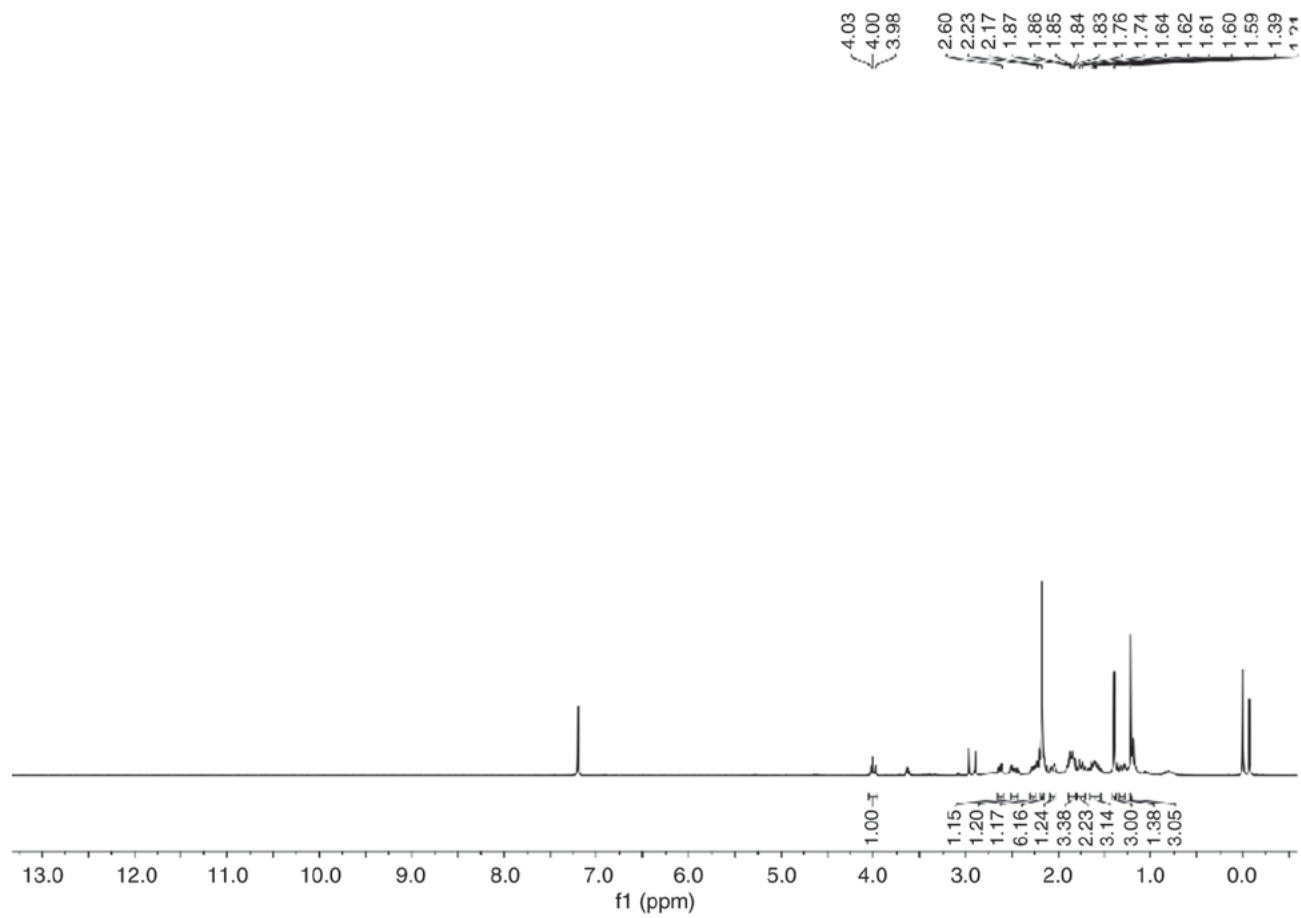

Figure S12.  $^{13}\text{C}$ -NMR spectrum for Compound 3.

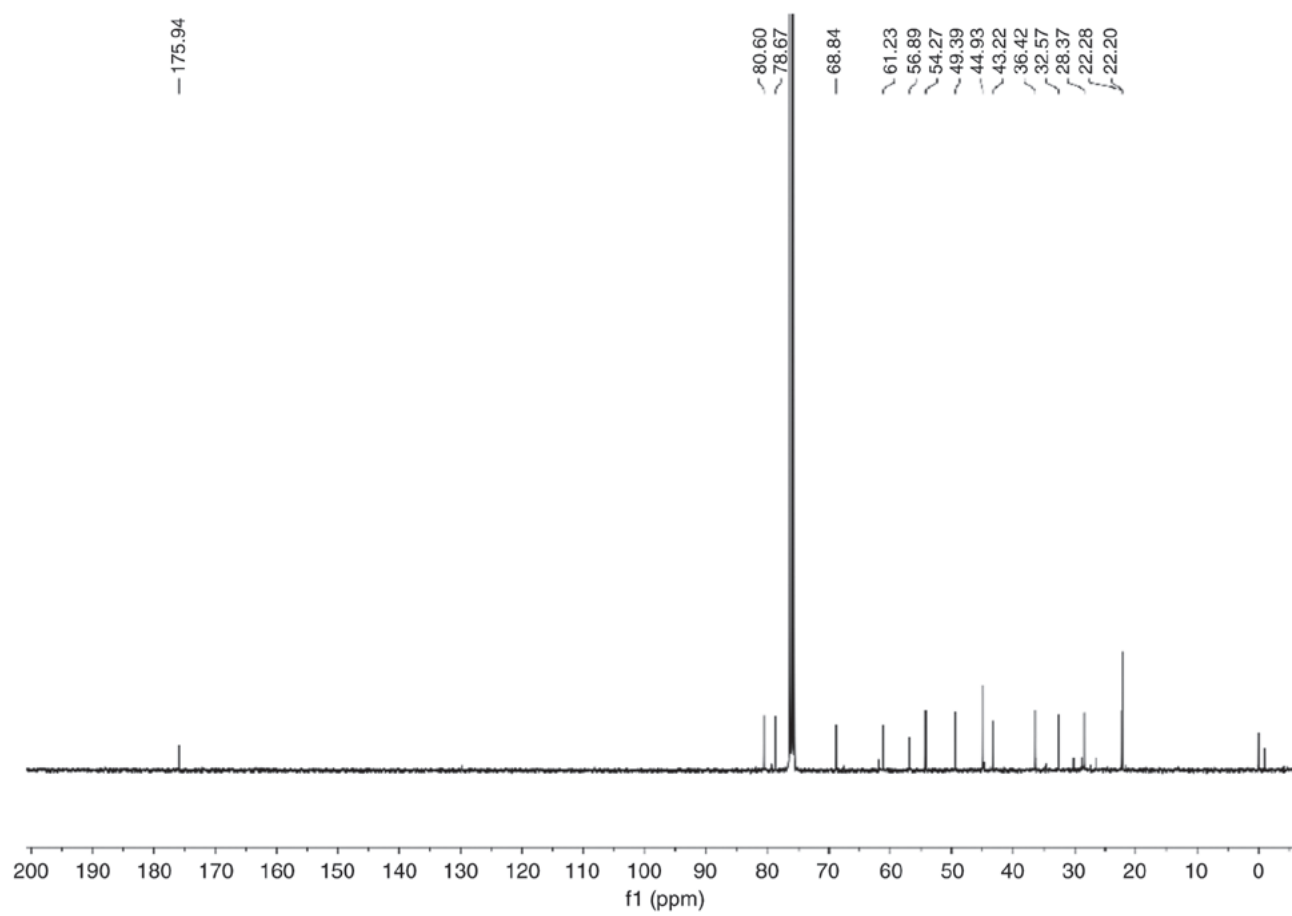

Figure S13. <sup>1</sup>H-NMR spectrum for Compound 4

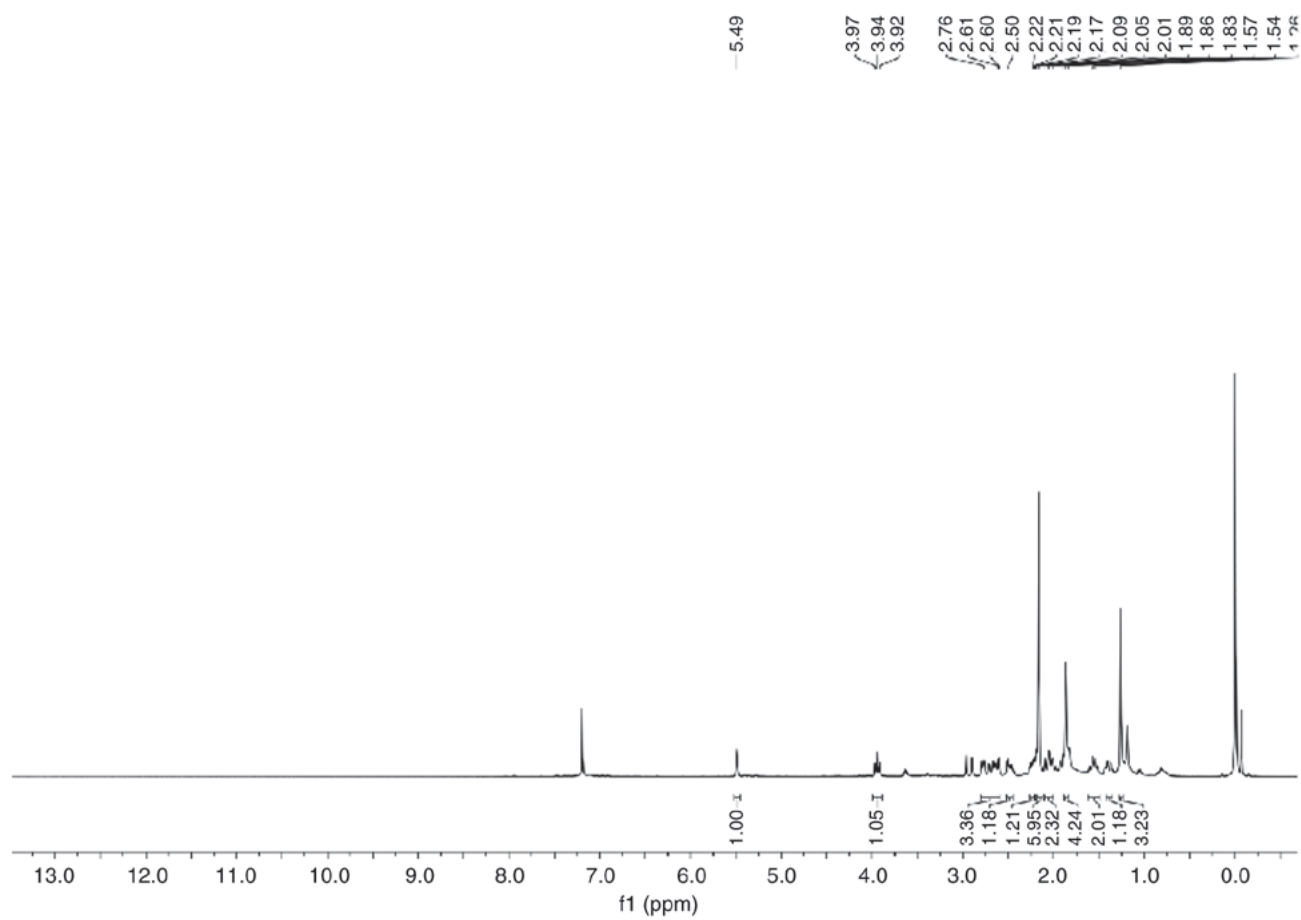

Figure S14.  $^{13}\text{C}$ -NMR spectrum for Compound 4.

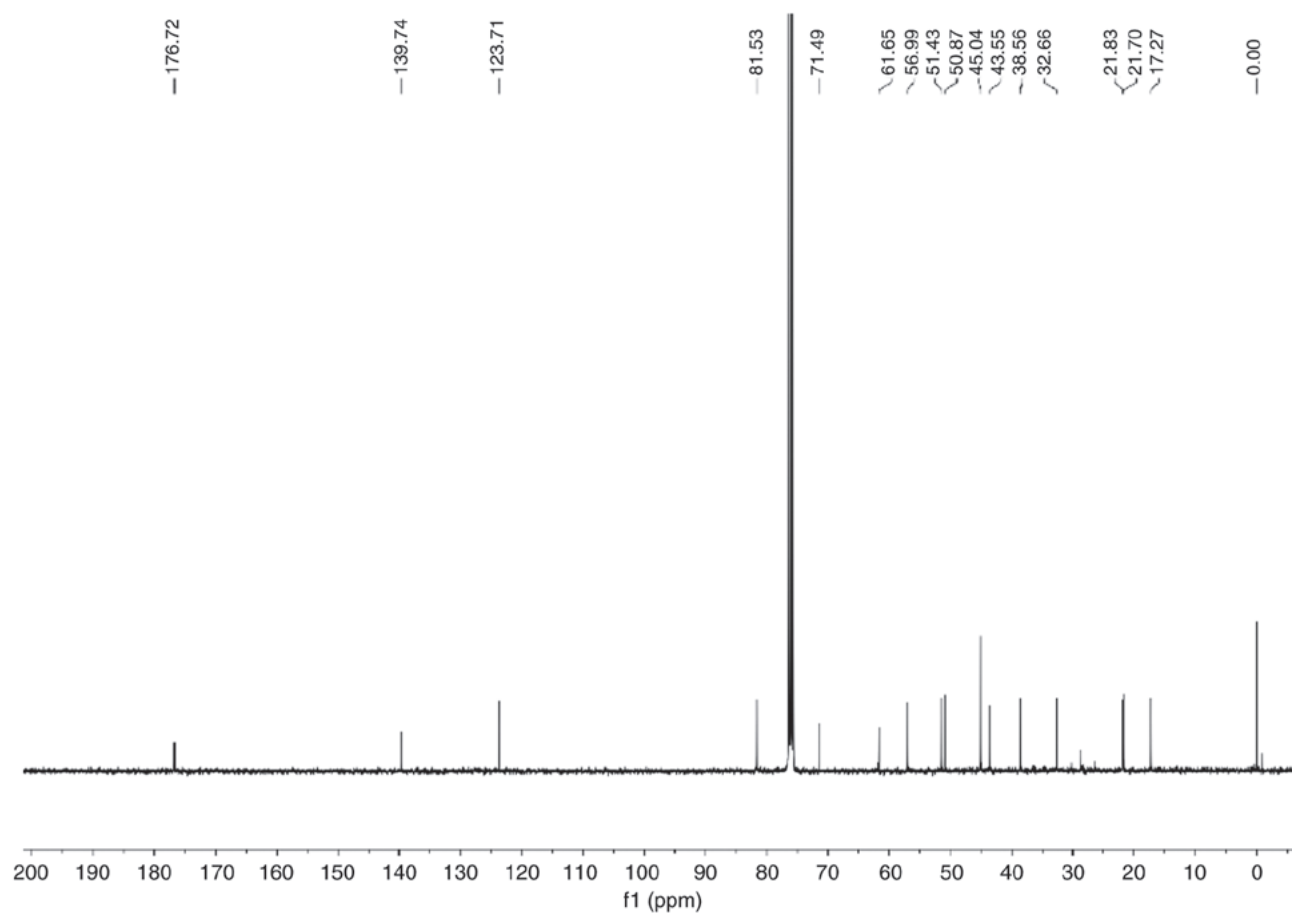



Figure S15.  $^1\text{H}$ -NMR spectrum for DMAPT-D6. DMAPT, dimethylaminoparthenolide.

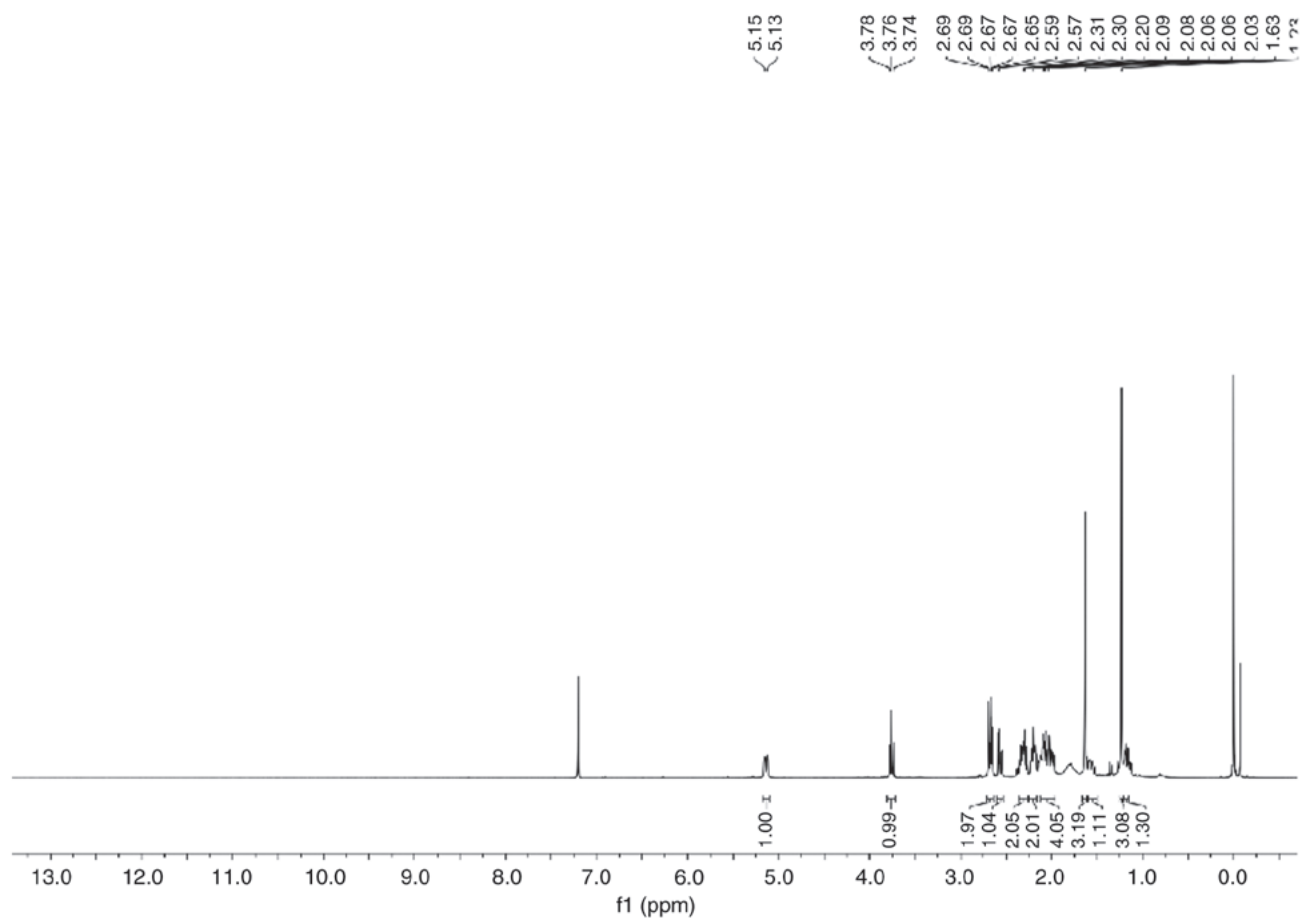

Figure S16.  $^{13}\text{C}$ -NMR spectrum for DMAPT-D6. DMAPT, dimethylaminoparthenolide.

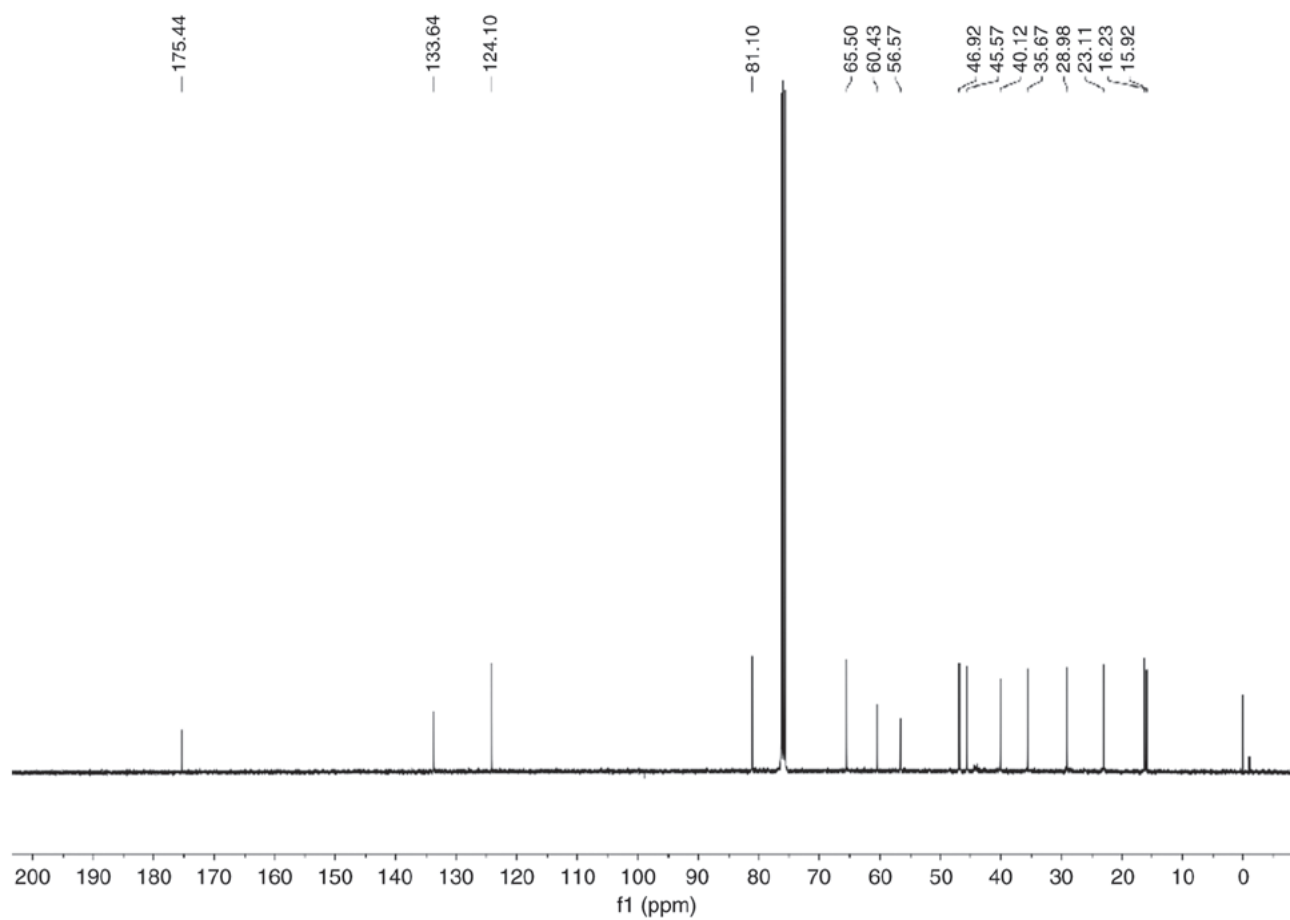

Figure S17. <sup>1</sup>H-NMR spectrum for Compound 5.

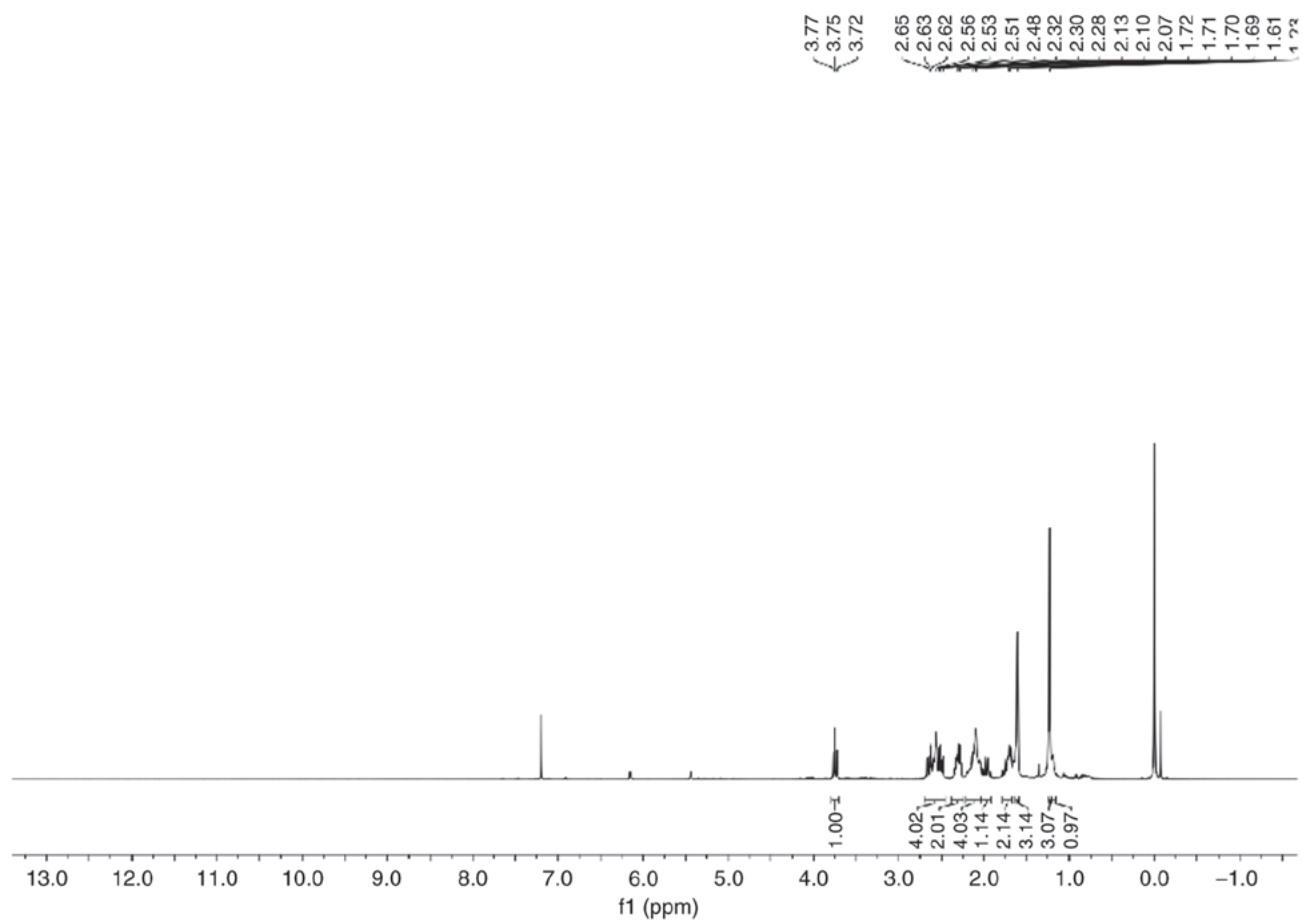

Figure S18.  $^{13}\text{C}$ -NMR spectrum for Compound 5.

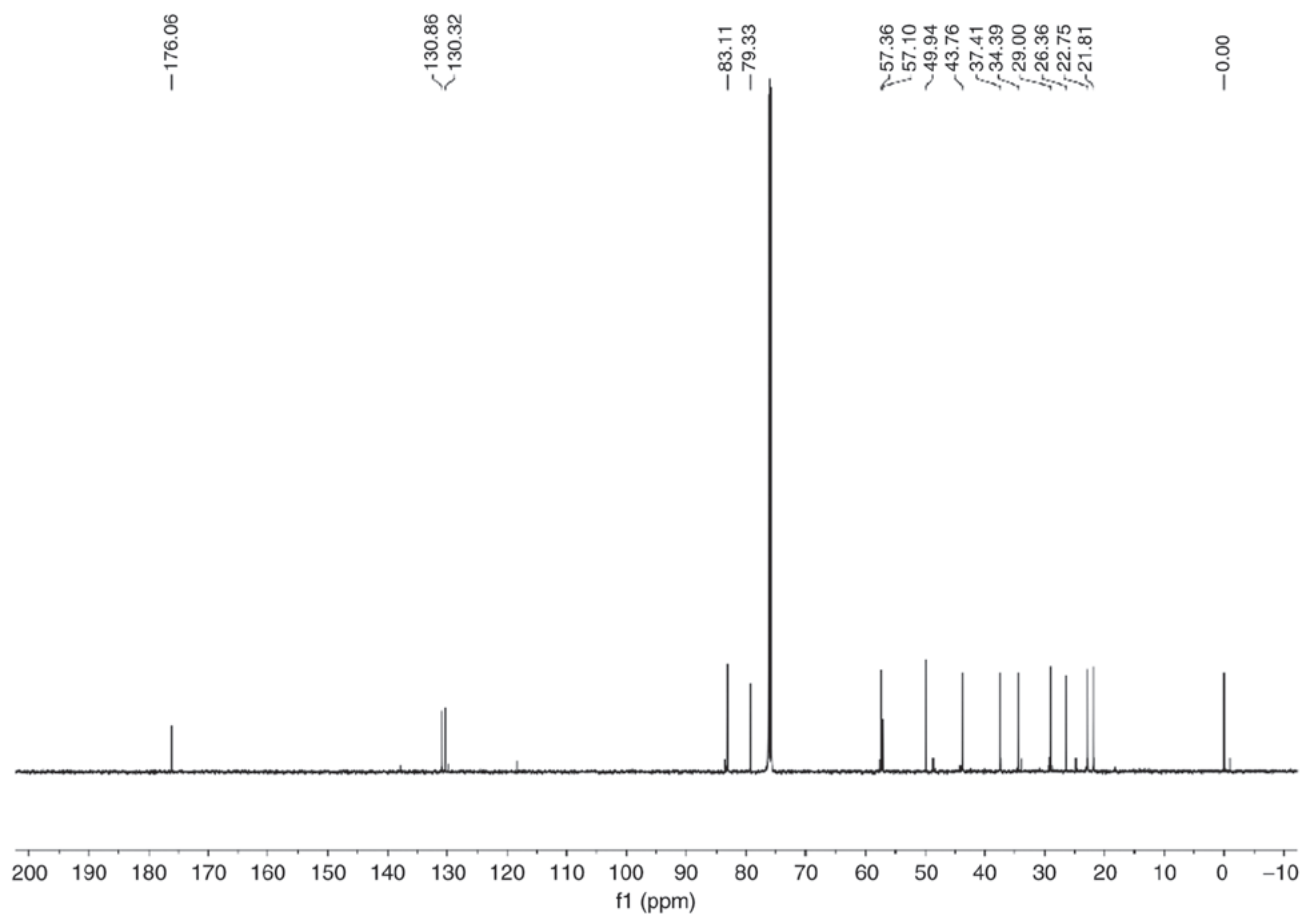

Figure S19.  $^1\text{H}$ -NMR spectrum for Compound 6.

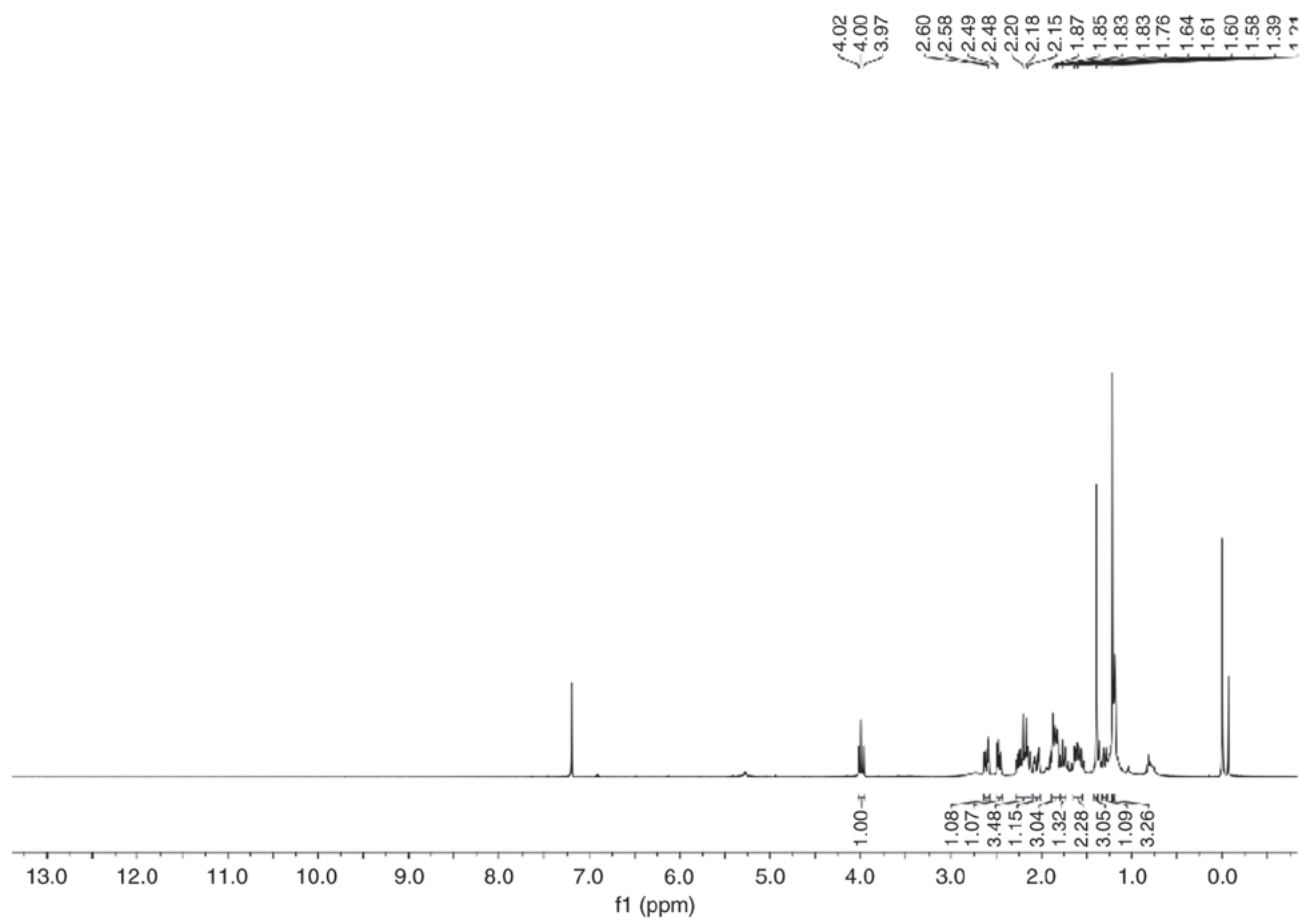

Figure S20.  $^{13}\text{C}$ -NMR spectrum for Compound 6.

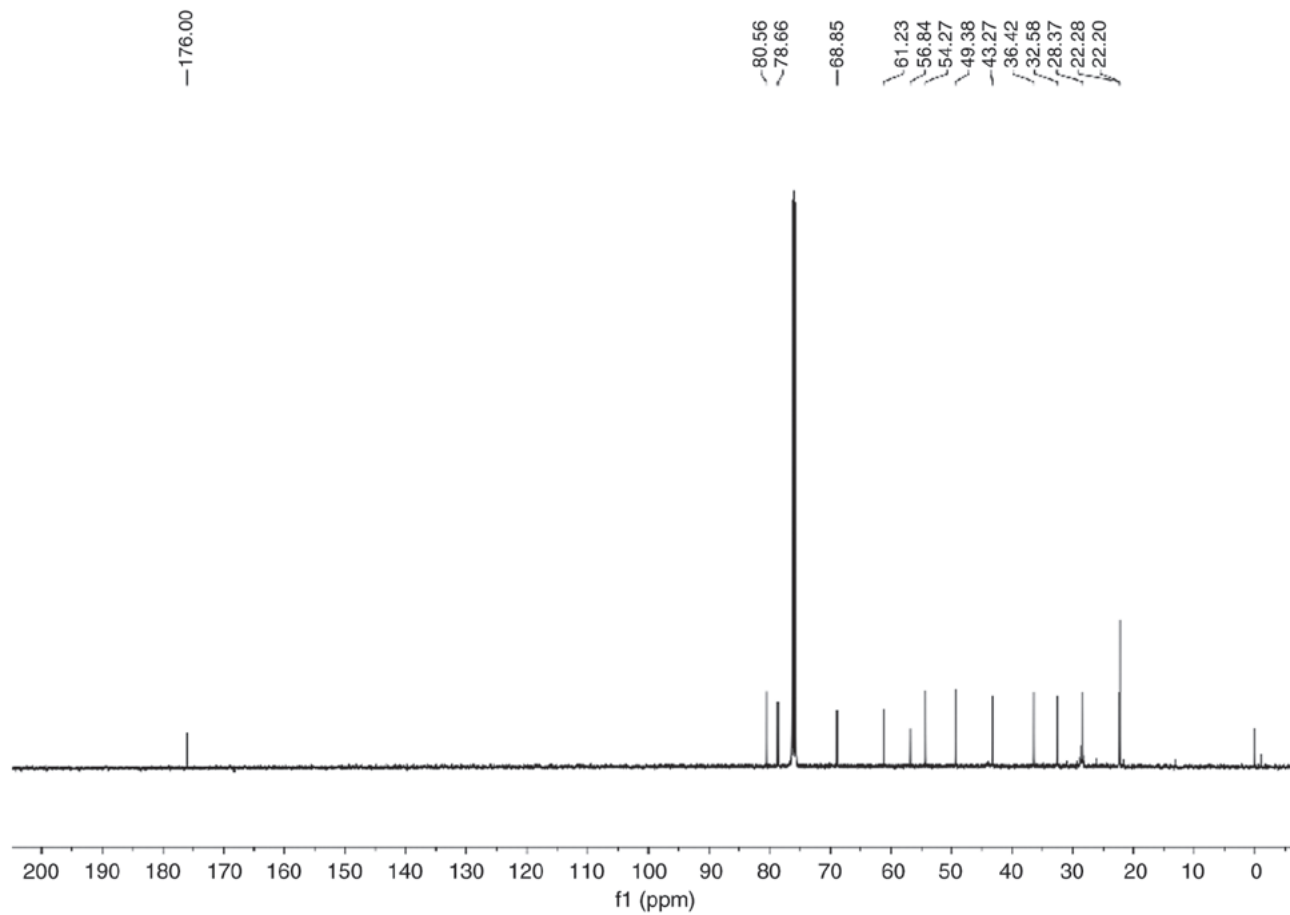

Figure S21.  $^1\text{H}$ -NMR spectrum for Compound 7.

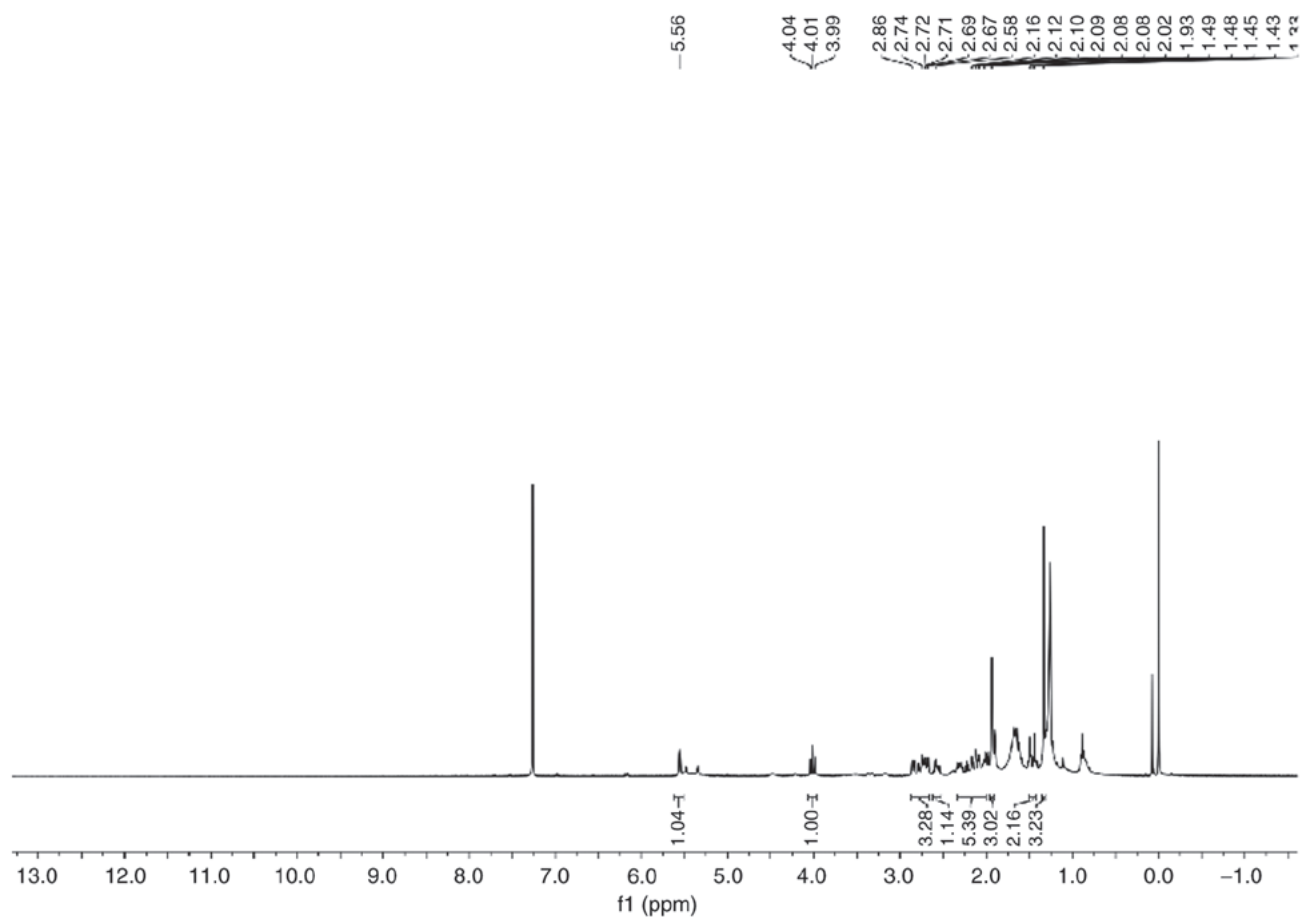

Figure S22.  $^{13}\text{C}$ -NMR spectrum for Compound 7.

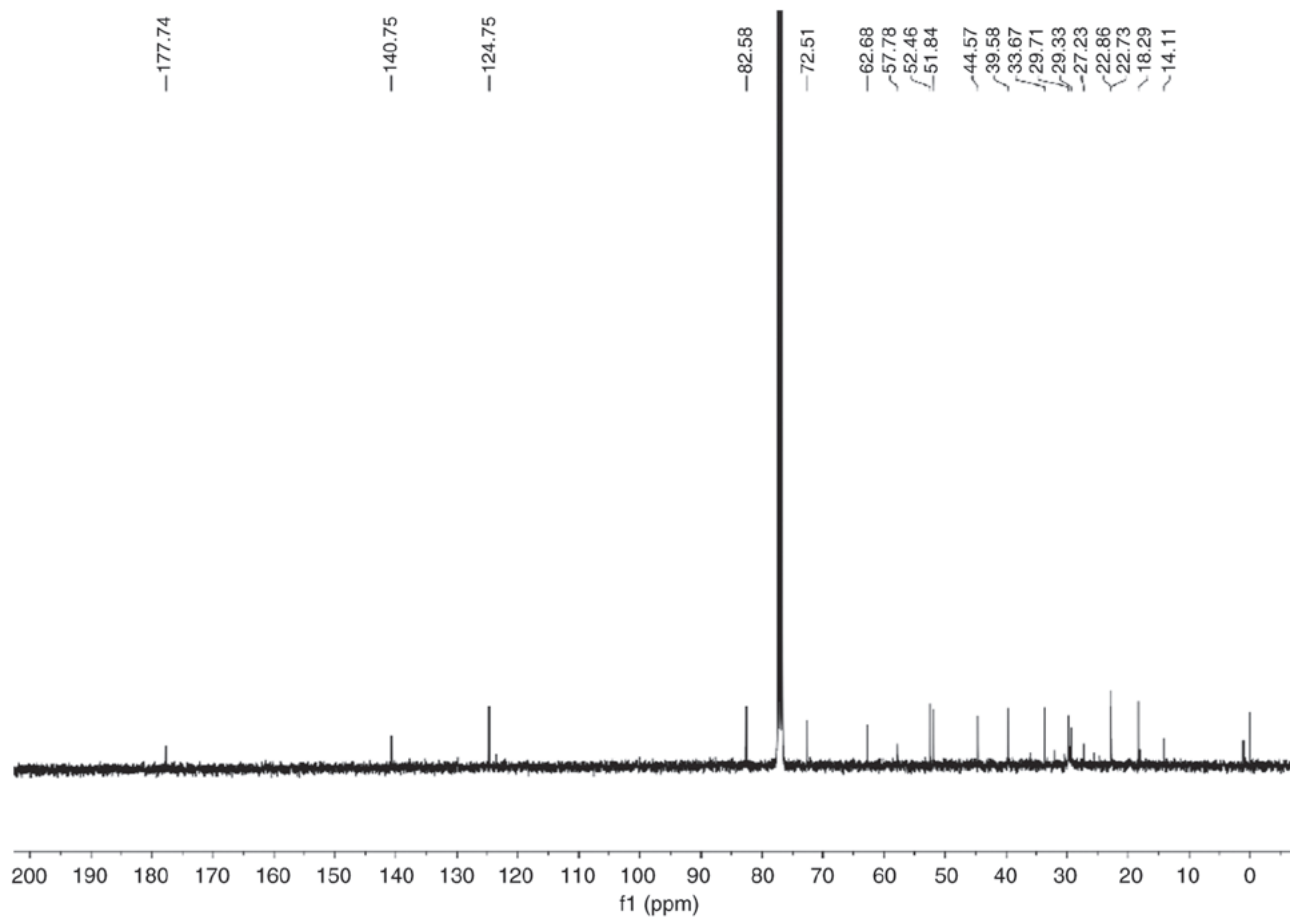



Table SI. IC<sub>50</sub> value of PTL derivatives was measured after 48 h treatment in U87 cells.

| Compounds  | U87-IC <sub>50</sub> ( $\mu$ M) | Compounds  | U87-IC <sub>50</sub> ( $\mu$ M) | Compounds  | U87-IC <sub>50</sub> ( $\mu$ M) |
|------------|---------------------------------|------------|---------------------------------|------------|---------------------------------|
| PTL        | 11.11                           | DMAPT      | 14.22                           | DMAPT-D6   | 15.50                           |
| MCL        | 11.69                           | Compound 2 | 11.44                           | Compound 5 | 25.17                           |
| Compound 1 | 29.87                           | Compound 3 | 32.79                           | Compound 6 | 59.16                           |
| Arglabin   | 22.96                           | Compound 4 | 15.57                           | Compound 7 | 18.02                           |

IC<sub>50</sub>, half maximal inhibitory concentration; PTL, parthenolide; MCL, micheliolide; DMAPT, dimethylaminoparthenolide.
